# Supplementary material for: Characterization of novel dual PTPN1 and PTPN2 inhibitors
Source: Research Square preprint supplement (doi:10.21203/rs.3.rs-2869323/v1), 2023-07-12
Supplement: Supplementary file 4 [file bc7c8e7f29473ce9896c397d.xlsx]

## Sheet: Benzotriazines
Lab Identifier	Structure	IUPAC name	Chemical formula	MW (g/mole)	Supplier	Catalog number
BIN001		3-Hydroxy-1,2,3-benzotriazin-4(3H)-one	C7H5N3O2	163.13	AK Scientific Inc.	P962
BIN002		1,2,3-Benzotriazine-4(3H)-one	C7H5N3O	147.13	Sigma-Aldrich	340545
BIN003		3-(Diethoxyphosphoryloxy)-1,2,3-benotriazin-4(3H)-one	C11H14N3O5P	299.2	ChemPep	120401
BIN004		O-(3,4-Dihydro-4-oxo-1,2,3-benzotriazin-3-yl)-N,N,N',N'-tetramethyluronium tetrafluoroborate	C12H16BF4N5O2	349.1	ChemPep	122003
BIN005		3-(3,5-XYLYL)-1,2,3-Benzotriazine-4(3H)-one	C15H13N3O	251.29	Sigma-Aldrich	S545643
BIN006		3-benzyl-1,2,3-benzotriazin-4(3H)-one	C14 H11 N3 O	237.3	Hit2Lead	7941441
BIN007		3-(4-fluorobenzyl)-1,2,3-benzotriazin-4(3H)-one	C14 H10 F N3 O	255.2	Hit2Lead	7953701
BIN008		3-(4-bromobenzyl)-1,2,3-benzotriazin-4(3H)-one	C14 H10 Br N3 O	316.2	Hit2Lead	7959047
BIN009		3-(2-chlorobenzyl)-1,2,3-benzotriazin-4(3H)-one	C14 H10 Cl N3 O	271.7	Hit2Lead	7962460
BIN010		3-(1-naphthylmethyl)-1,2,3-benzotriazin-4(3H)-one	C18 H13 N3 O	287.3	Hit2Lead	7993288
BIN011		3-(4-pyridinylmethyl)-1,2,3-benzotriazin-4(3H)-one	C13 H10 N4 O	238.2	Hit2Lead	9195983
BIN012		3-(2-phenylethyl)-1,2,3-benzotriazin-4(3H)-one	C15 H13 N3 O	251.3	Hit2Lead	9195985
BIN013		3-(1-methyl-2-oxo-2-phenylethyl)-1,2,3-benzotriazin-4(3H)-one	C16 H13 N3 O2	279.3	Hit2Lead	7999178
BIN014		3-(2-oxo-2-phenylethyl)-1,2,3-benzotriazin-4(3H)-one	C15 H11 N3 O2	265.3	Hit2Lead	9000578
BIN015		4-(4-oxo-1,2,3-benzotriazin-3(4H)-yl)butanoic acid	C11 H11 N3 O3	233.2	Hit2Lead	9033494
BIN016		(4-oxo-1,2,3-benzotriazin-3(4H)-yl)acetic acid	C9 H7 N3 O3	205.2	Hit2Lead	9040855
BIN017		2-(4-oxo-1,2,3-benzotriazin-3(4H)-yl)propanoic acid	C10 H9 N3 O3	219.2	Hit2Lead	9255264
BIN018		3-(4-oxo-1,2,3-benzotriazin-3(4H)-yl)propanoic acid	C10 H9 N3 O3	219.2	Hit2Lead	9272707
BIN019		3-(2-aminoethyl)-1,2,3-benzotriazin-4(3H)-one hydrochloride	C9 H10 N4 O . Cl H	226.7	Hit2Lead	9125397
BIN020		3-[2-(dimethylamino)ethyl]-1,2,3-benzotriazin-4(3H)-one	C11 H14 N4 O	218.3	Hit2Lead	9195966
BIN021		3-[3-(dimethylamino)propyl]-1,2,3-benzotriazin-4(3H)-one	C12 H16 N4 O	232.3	Hit2Lead	9195968
BIN022		methyl (4-oxo-1,2,3-benzotriazin-3(4H)-yl)acetate	C10 H9 N3 O3	219.2	Hit2Lead	9248977
BIN023		3-methyl-1,2,3-benzotriazine-4(3H)-thione	C8H7N3S	177.229	Sigma-Aldrich	PH007440
BIN024		4-(TERT-BUTOXYCARBONYLAMINO-ME)-BENZOIC ACID OXO-BENZO(D)(1,2,3)TRIAZIN-YL ESTER	C20H20N4O5	396.41	Sigma-Aldrich	S283320
BIN025		3,6-dihydroxy-2-methyl-4(3H)-quinazolinone	C9 H8 N2 O3	192.2	Hit2Lead	9335007
BIN026		3-(allyloxy)-2-phenyl-4(3H)-quinazolinone	C17 H14 N2 O2	278.3	Hit2Lead	6212300
BIN027		1-hydroxy-2(1H)-quinolinone	C9 H7 N O2	161.2	hit2Lead	5175162
BIN028		2-(benzyloxy)-1H-isoindole-1,3(2H)-dione	C15 H11 N O3	253.3	Hit2Lead	5136094
BIN029		2-(acetyloxy)-1,3,4(2H)-isoquinolinetrione	C11 H7 N O5	233.2	Hit2Lead	5215322
BIN030		3-hydroxy-2-(2-hydroxyphenyl)-2,3-dihydro-4(1H)-quinazolinone	C14 H12 N2 O3	256.3	Hit2Lead	5856974
BIN031		2-hydroxy-1H-benzo[de]isoquinoline-1,3(2H)-dione	C12 H7 N O3	213.2	Hit2Lead	5354724
BIN032		N-hydroxy-N'-methyl-N-phenylurea	C8 H10 N2 O2	166.2	Hit2Lead	5130358
BIN033		N-hydroxy-4-methoxy-N-phenylbenzamide	C14 H13 N O3	243.3	Hit2Lead	5135373
BIN034		potassium 6-chloro-1,3-dioxo-1H-benzo[de]isoquinolin-2(3H)-olate	C12 H6 Cl N O3	247.6	Hit2Lead	5346250
BIN035		5-amino-2-hydroxy-1H-benzo[de]isoquinoline-1,3(2H)-dione	C12 H8 N2 O3	228.2	Hit2Lead	5352272
BIN036		2-hydroxy-6-nitro-1H-benzo[de]isoquinoline-1,3(2H)-dione-d_1_	C12 H6 N2 O5	259.2	Hit2Lead	5354341
BIN037		2-butoxy-1H-benzo[de]isoquinoline-1,3(2H)-dione	C16 H15 N O3		Hit2Lead	5357757
BIN038		6,7-dichloro-2-hydroxy-1H-benzo[de]isoquinoline-1,3(2H)-dione	C12 H5 Cl2 N O3	269.3	Hit2Lead	5401701
BIN039		2-(benzyloxy)-1H-benzo[de]isoquinoline-1,3(2H)-dione	C19 H13 N O3	282.1	Hit2Lead	5401841
BIN040		2,5-dihydroxy-1H-benzo[de]isoquinoline-1,3(2H)-dione	C12 H7 N O4	303.3	Hit2Lead	5525750
BIN041		2-hydroxy-1,3-dioxo-2,3-dihydro-1H-benzo[de]isoquinoline-6-carboxylic acid	C13 H7 N O5	229.2	Hit2Lead	5531948
BIN042		5-bromo-2-hydroxy-1H-benzo[de]isoquinoline-1,3(2H)-dione	C12 H6 Br N O3	257.2	Hit2Lead	5551728
BIN043		6-bromo-2-hydroxy-1H-benzo[de]isoquinoline-1,3(2H)-dione	C12 H6 Br N O3	292.1	Hit2Lead	5568285
BIN044		17-hydroxy-17-azapentacyclo[6.6.5.0~2,7~.0~9,14~.0~15,19~]nonadeca-2,4,6,9,11,13-hexaene-16,18-dione	C18 H13 N O3	292.1	Hit2Lead	5918715
BIN045		2-amino-5-hydroxy-1H-benzo[de]isoquinoline-1,3(2H)-dione	C12 H8 N2 O3	291.3	Hit2Lead	5919970
BIN046		2-[(2-methylbenzoyl)oxy]-1H-benzo[de]isoquinoline-1,3(2H)-dione	C20 H13 N O4	228.2	Hit2Lead	7746592
BIN047		2-(butyryloxy)-1H-benzo[de]isoquinoline-1,3(2H)-dione	C16 H13 N O4	331.3	Hit2Lead	7749960
BIN048		2-[(2-methoxybenzoyl)oxy]-1H-benzo[de]isoquinoline-1,3(2H)-dione	C20 H13 N O5	283.3	Hit2Lead	7752913
BIN049		2-[(3-pyridinylcarbonyl)oxy]-1H-benzo[de]isoquinoline-1,3(2H)-dione	C18 H10 N2 O4	347.3	Hit2Lead	7757622
BIN050		2-[(3-phenoxybenzoyl)oxy]-1H-benzo[de]isoquinoline-1,3(2H)-dione	C25 H15 N O5	318.3	Hit2Lead	7767962
BIN051		2-(benzoyloxy)-1H-benzo[de]isoquinoline-1,3(2H)-dione	C19 H11 N O4	409.4	Hit2Lead	7768863
BIN052		2-(isonicotinoyloxy)-1H-benzo[de]isoquinoline-1,3(2H)-dione	C18 H10 N2 O4	317.3	Hit2Lead	7773548
BIN053		2-hydroxy-6-methoxy-1H-benzo[de]isoquinoline-1,3(2H)-dione	C13 H9 N O4	318.3	Hit2Lead	7826253
